# Supplementary material for: Host conditioning with IL-1β improves the antitumor function of adoptively transferred T cells
Source: PubMed Central journal article supplement (PMC6829590; doi:10.1084/jem.20181218), 2019-08-12
Supplement: JEM_20181218_sm.pdf [file JEM_20181218_sm.pdf]

## Supplemental material

Lee et al., <https://doi.org/10.1084/jem.20181218>

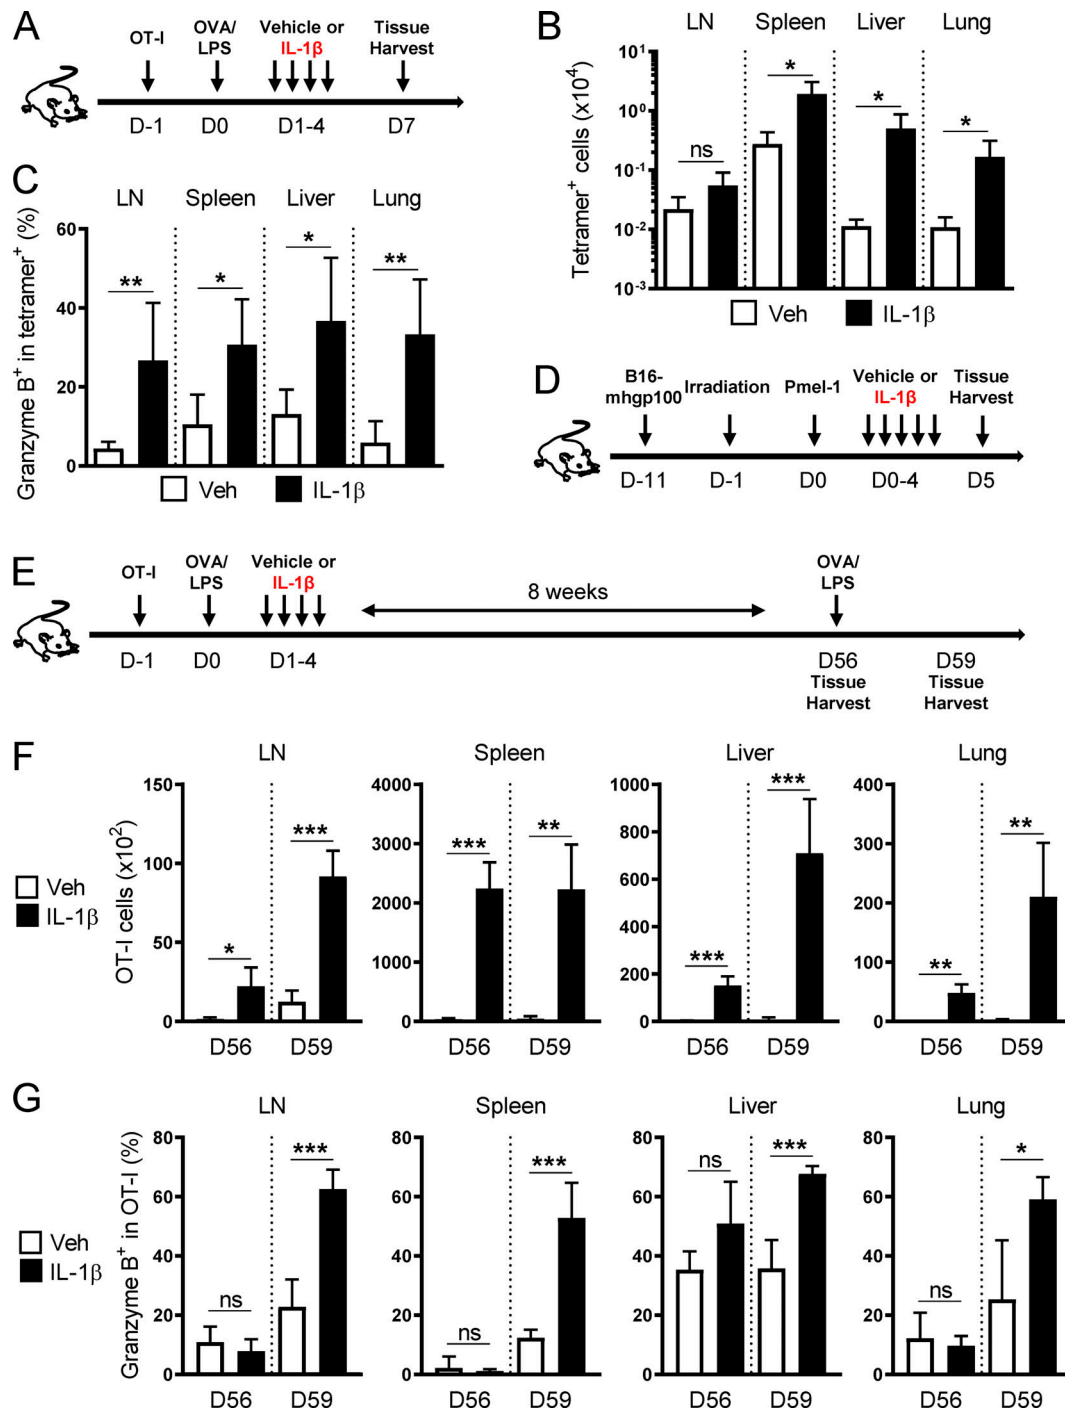

**Figure S1. Administration of IL-1 $\beta$  enhances primary and recall CD8<sup>+</sup> T cell responses.** (A) A schematic illustrating the generation of a primary OT-I response by OVA/LPS. Naive OT-I cells (CD45.1<sup>+</sup>) were transferred to a congenic host (CD45.1<sup>+</sup>CD45.2<sup>+</sup>) on day (D) -1, followed by OVA/LPS immunization on day 0 and four daily injections of vehicle or IL-1 $\beta$  on days 1-4. Tissues were harvested on day 7. (B and C) Absolute cell number and frequency of SIINFEKL/H2-K<sup>b</sup> tetramer<sup>+</sup> CD8<sup>+</sup> T cells expressing Gzm B isolated on day 7 from vehicle (white bars)- and IL-1 $\beta$  (black bars)-treated mice as described in A (n = 5). (D) A schematic illustrating the treatment of B16-mhgp100-bearing mice with the adoptive transfer of Pmel-1 cells. Mice bearing 10-d-old B16-mhgp100 tumors received total body irradiation on day -1, followed by the infusion of naive Pmel-1 cells on day 0 and five daily injections of vehicle or IL-1 $\beta$  on days 0-4. Mice were either euthanized on day 5 for tissue harvesting or kept for  $\leq 60$  d for tumor measurements. (E) A schematic illustrating the generation of a recall OT-I response by OVA/LPS. Naive OT-I cells were transferred to a congenic host on day -1, followed by OVA/LPS immunization on day 0 and four daily injections of vehicle or IL-1 $\beta$  on days 1-4. An OVA/LPS boost was given on D56, and the tissues were harvested before (D56) and three days after (D59) the boost. (F and G) Absolute cell number and frequency of OT-I cells expressing Gzm B isolated on days 56 and 59 from vehicle (white bars)- and IL-1 $\beta$  (black bars)-treated mice as described in E (n = 4). Data are representative of two independent experiments (\*, P < 0.05; \*\*, P < 0.01; \*\*\*, P < 0.001; ns, not significant; error bars, SD).

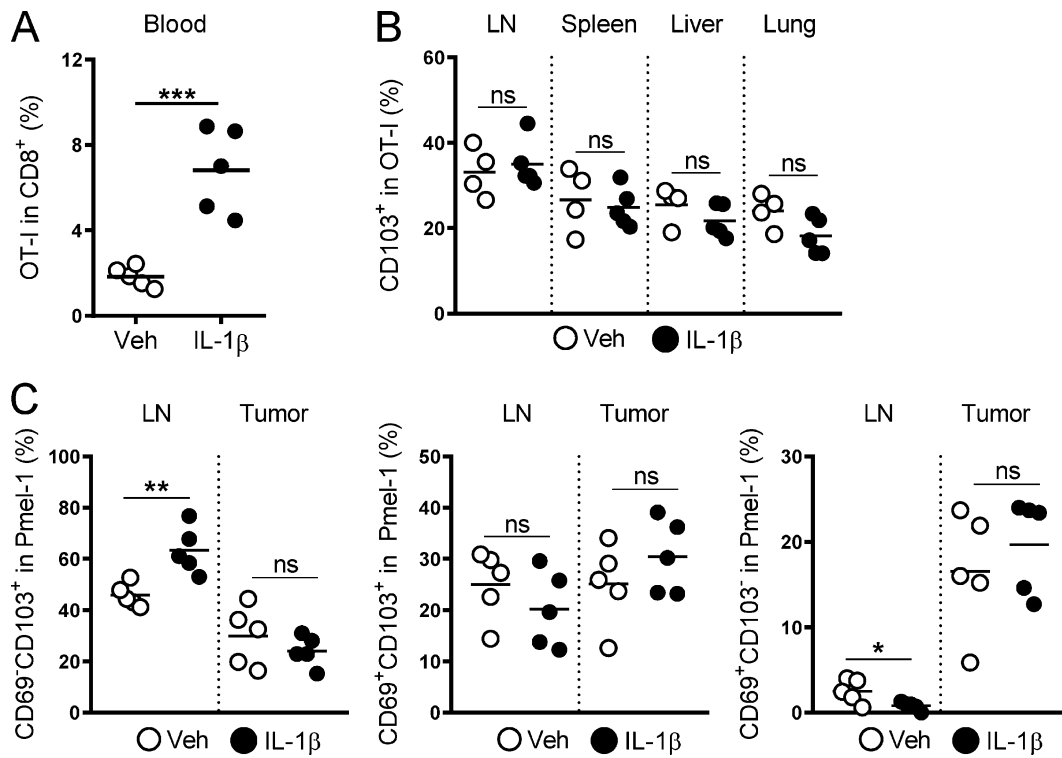

Figure S2. **Administration of IL-1 $\beta$  does not facilitate the acquisition of a Trm phenotype.** (A) Frequency of OT-I cells on day 6 in the blood from vehicle (white circles)- and IL-1 $\beta$  (black circles)-treated mice ( $n = 5$ ). (B) Frequency of OT-I cells expressing CD103 isolated on day 6 from vehicle (white circles)- and IL-1 $\beta$  (black circles)-treated mice ( $n = 4$  or 5). (C) Frequency of Pmel-1 cells expressing CD103 alone, CD69 and CD103, and CD69 alone isolated on day 5 from vehicle (white circles)- and IL-1 $\beta$  (black circles)-treated tumor-bearing mice ( $n = 5$ ). Data are representative of two independent experiments (\*,  $P < 0.05$ ; \*\*,  $P < 0.01$ ; \*\*\*,  $P < 0.001$ ; ns, not significant).

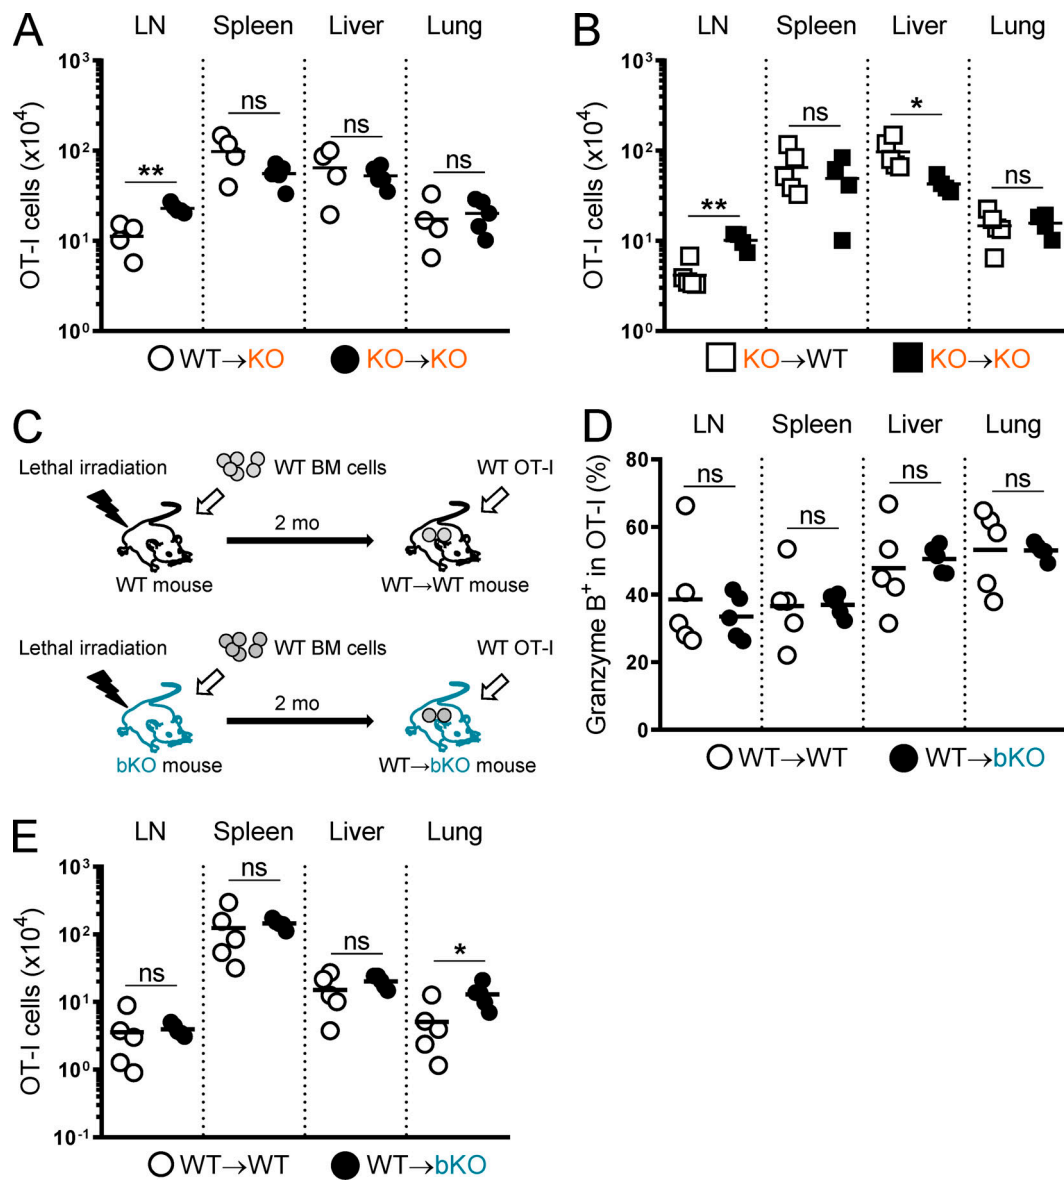

Figure S3. **Differential role of radio-sensitive and radio-resistant host cells in mediating IL-1 $\beta$  enhancement of CD8<sup>+</sup> T cell responses.** (A) Absolute number of OT-I cells isolated on day 6 from WT→KO (white circles) and KO→KO (black circles) mice treated with OVA/LPS on day 0 and IL-1 $\beta$  on days 1–4 as described in Fig. 6 C ( $n = 4$  or 5). (B) Absolute number of OT-I cells isolated on day 6 from KO→WT (white squares) and KO→KO (black squares) mice treated with OVA/LPS on day 0 and IL-1 $\beta$  on days 1–4 as described in Fig. 6 E ( $n = 5$  or 4). (C) A schematic illustrating the generation of bone marrow chimeric mice. WT→WT and WT→ $\beta$ 2M KO (bKO) mice were generated by reconstituting lethally irradiated WT or  $B2m^{-/-}$  (bKO) mice with WT bone marrow cells, respectively. 2 mo later, WT OT-I cells were transferred to the bone marrow chimeric hosts, followed by OVA/LPS and IL-1 $\beta$  treatments ( $n = 5$ ). (D and E) Frequency of OT-I cells expressing Gzm B and absolute OT-I cell number isolated on day 6 from WT→WT (white circles) and WT→bKO (black circles) mice treated with OVA/LPS on day 0 and IL-1 $\beta$  on days 1–4 as described in C. Data are representative of two independent experiments (\*,  $P < 0.05$ ; \*\*,  $P < 0.01$ ; ns, not significant).

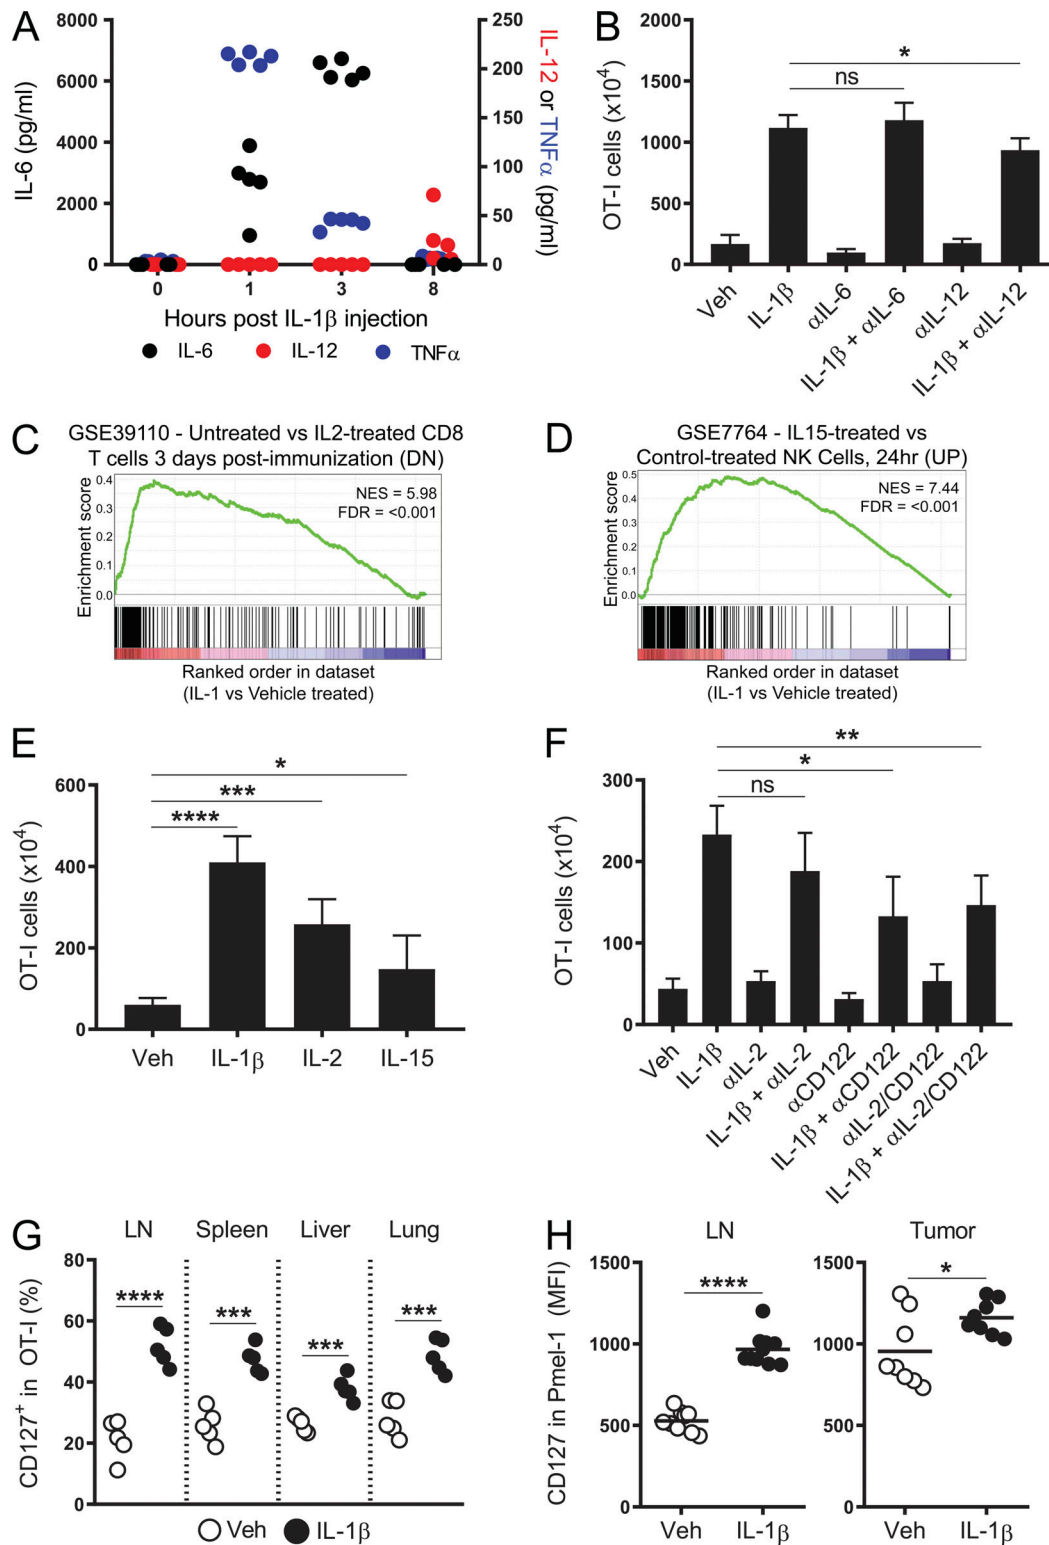

Figure S4. **Role of the cytokine milieu in mediating IL-1 $\beta$  enhancements of CD8 $^+$  T cell responses.** (A) Blood samples were collected 0, 1, 3, and 8 h after a single s.c. injection of IL-1 $\beta$  (2  $\mu$ g). Serum levels of IL-6 (black circles), IL-12p70 (red circles), and TNF $\alpha$  (blue circles) were measured by ELISA ( $n = 5$ ). (B) Absolute number of OT-I cells isolated on day 6 from the spleen of mice injected with OVA/LPS on day 0 and indicated treatments on days 1–4 ( $n = 5$ ). (C and D) GSEA plots showing the enrichment of IL-2- and IL-15-induced genes in IL-1 $\beta$ - versus vehicle-exposed OT-I cells as described in Fig. 2 A. NES, normalized enrichment score; FDR, false discovery rate. (E and F) Absolute number of OT-I cells isolated on day 6 from the spleen of mice injected with OVA/LPS on day 0 and indicated treatments on days 1–4 ( $n = 5$ ). (G) Frequency of OT-I cells expressing IL-7R $\alpha$  (CD127) isolated on day 6 from mice treated with OVA/LPS on day 0 and vehicle or IL-1 $\beta$  on days 1–4 ( $n = 5$ ). (H) Mean fluorescence intensity (MFI) of CD127 expression in Pmel-1 cells isolated on day 5 from B16-mhgp100-bearing mice treated with vehicle or IL-1 $\beta$  on days 0–4 ( $n = 8$ ). Data are representative of two (A, B, E, and H) or three (F and G) independent experiments (\*,  $P < 0.05$ ; \*\*,  $P < 0.01$ ; \*\*\*,  $P < 0.001$ ; \*\*\*\*,  $P < 0.0001$ ; ns, not significant; error bars, SD).

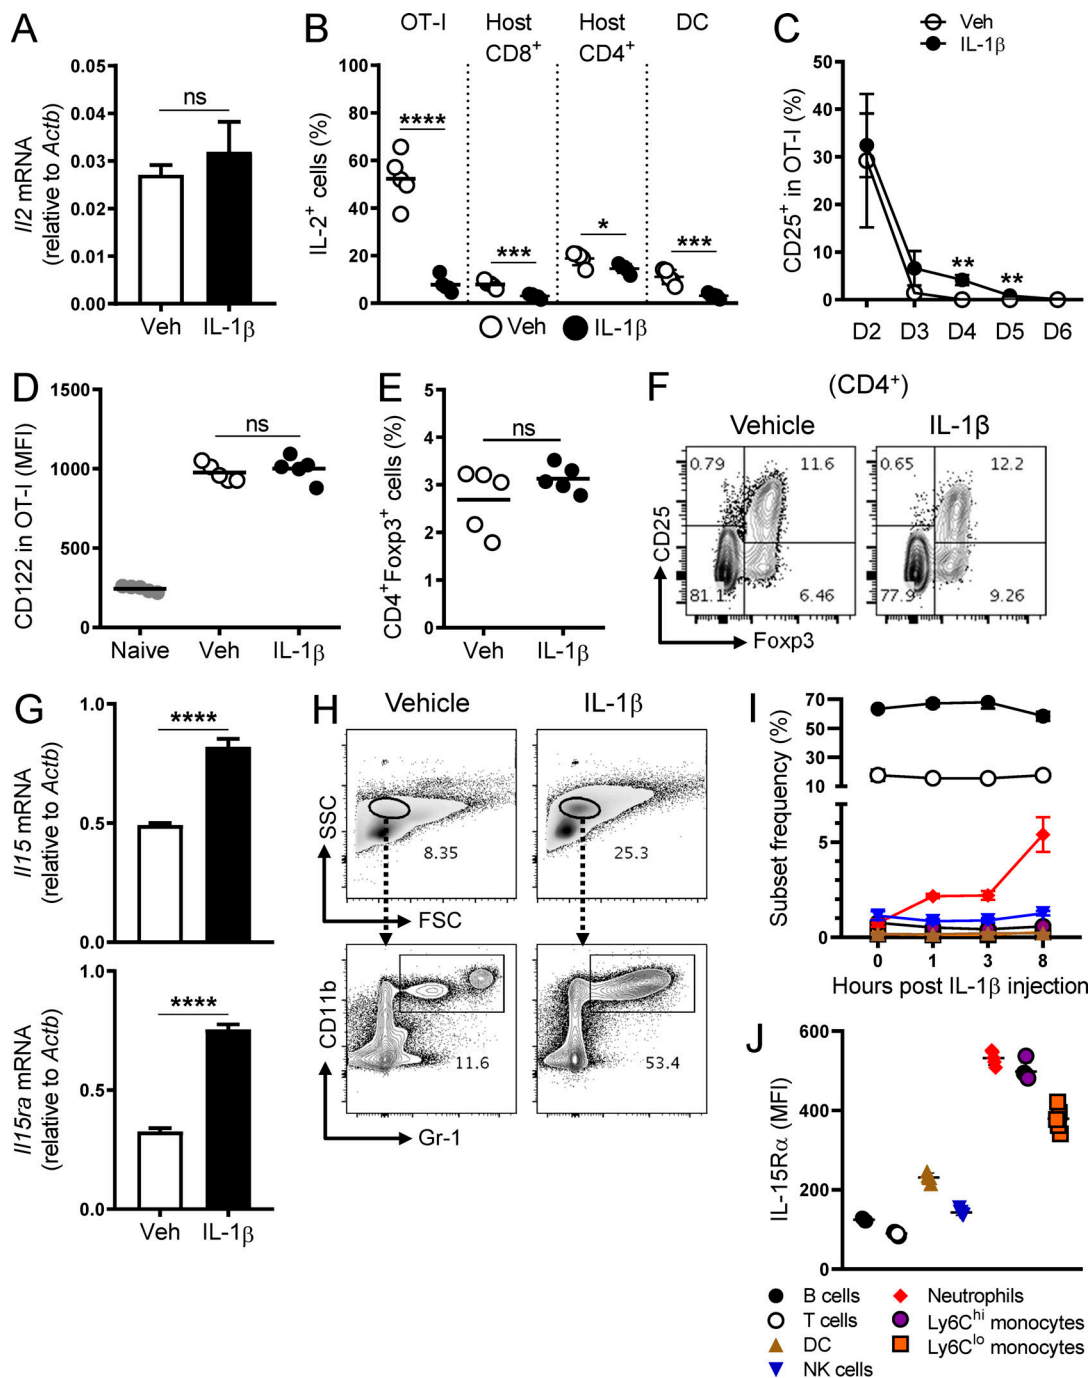

**Figure S5. Impact of IL-1 $\beta$  on the availability of IL-2 and IL-15 to CD8<sup>+</sup> T cells.** (A) Levels of the *Il2* mRNA in total splenocytes from vehicle (white bars)- and IL-1 $\beta$  (black bars)-treated mice ( $n = 5$ ). (B) Frequency of the indicated cell populations expressing IL-2 in the spleen on day 6 from vehicle (white circles)- and IL-1 $\beta$  (black circles)-treated mice ( $n = 5$ ). OT-I: B220<sup>-</sup>CD3<sup>+</sup>CD8<sup>+</sup>V $\alpha$ 2<sup>+</sup>CD45.1<sup>+</sup>CD45.2<sup>-</sup>, host CD8<sup>+</sup>: B220<sup>-</sup>CD3<sup>+</sup>CD8<sup>+</sup>CD45.1<sup>+</sup>CD45.2<sup>+</sup>, host CD4<sup>+</sup>: B220<sup>-</sup>CD3<sup>+</sup>CD4<sup>+</sup>CD45.1<sup>+</sup>CD45.2<sup>+</sup>, dendritic cell: B220<sup>-</sup>CD3<sup>+</sup>CD11c<sup>+</sup>NK1.1<sup>-</sup>. (C) Frequency of OT-I cells expressing CD25 isolated on days 2-6 from the draining LNs of vehicle (white circles)- and IL-1 $\beta$  (black circles)-treated mice ( $n = 3$ ). (D) IL-2/15R $\beta$  (CD122) MFI in OT-I cells isolated on day 6 from the spleen of vehicle (white circles)- and IL-1 $\beta$  (black circles)-treated mice. Host naive CD8<sup>+</sup> T cells (naive; CD8<sup>+</sup>CD44<sup>lo</sup> gated) were used as a negative control ( $n = 5$ ). (E) Frequency of CD4<sup>+</sup>Foxp3<sup>+</sup> cells in total splenocytes isolated on day 6 from vehicle (white circles)- and IL-1 $\beta$  (black circles)-treated mice ( $n = 5$ ). (F) Representative contour plots showing Foxp3 and CD25 expression in CD4<sup>+</sup> T cells as described in E. (G) Levels of the *Il15* and *Il15ra* mRNA in total splenocytes from vehicle (white bars)- and IL-1 $\beta$  (black bars)-treated mice ( $n = 5$ ). (H) Representative contour plots showing the frequency of the FSC<sup>int</sup>SSC<sup>int</sup> population in the spleen on day 6 from vehicle- and IL-1 $\beta$ -treated mice. The frequency of CD11b<sup>+</sup>Gr-1<sup>+</sup> cells within the FSC<sup>int</sup>SSC<sup>int</sup> population is shown below. (I) Population kinetics of the indicated cell types in the spleen upon a single injection of IL-1 $\beta$  (2  $\mu$ g). B cells: B220<sup>-</sup>CD3<sup>+</sup>, DC: B220<sup>-</sup>CD3<sup>+</sup>CD11c<sup>+</sup>NK1.1<sup>-</sup>, NK cells: B220<sup>-</sup>CD3<sup>+</sup>NK1.1<sup>+</sup>, neutrophils: B220<sup>-</sup>CD3<sup>+</sup>CD11c<sup>+</sup>NK1.1<sup>-</sup>CD11b<sup>+</sup>Ly6G<sup>+</sup>Ly6C<sup>int</sup>, Ly6C<sup>hi</sup> monocytes: B220<sup>-</sup>CD3<sup>+</sup>CD11c<sup>+</sup>NK1.1<sup>-</sup>CD11b<sup>+</sup>Ly6G<sup>-</sup>Ly6C<sup>hi</sup>, Ly6C<sup>lo</sup> monocytes: B220<sup>-</sup>CD3<sup>+</sup>CD11c<sup>+</sup>NK1.1<sup>-</sup>CD11b<sup>+</sup>Ly6G<sup>-</sup>Ly6C<sup>lo</sup> ( $n = 5$ ). (J) MFI of IL-15R $\alpha$  expression in the indicated cell types in the spleen ( $n = 5$ ). Data are representative of two (A-D and G-J) or four (E and F) independent experiments (\*,  $P < 0.05$ ; \*\*,  $P < 0.01$ ; \*\*\*,  $P < 0.001$ ; \*\*\*\*,  $P < 0.0001$ ; ns, not significant; error bars, SD).

Table S1 is provided online as a separate Excel file and shows RNA-seq analysis of the global transcriptome profile of IL-1 $\beta$ - versus vehicle-exposed OT-I cells in vivo.
